# Supplementary material for: Efficient stabilization of natural curcuminoids mediated by oil body encapsulation
Source: Royal Society of Chemistry journal article supplement (doi:10.1039/c3ra40552d), 2013-01-01

**Supplementary Figure 1.** Effect of curcumin, demethoxycurcumin, and bisdemethoxycurcumin on MDA-231 cell viability. MDA-231 were seeded onto 96-multiwell plates and treated with the different compounds at the indicated concentrations ( $\mu\text{M}$ ) for 24 h (black column), 48 h (grey column), and 72 h (white column). \*\*\*  $p < 0.001$ , \*  $p < 0.05$  compared with the untreated group. CTR = control cells.

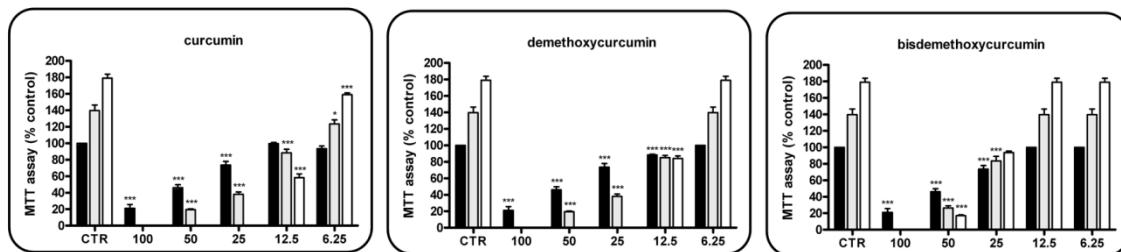

**Supplementary Figure 2.** Effect of free-ROBs on cell proliferation and morphology. SKOV-3 cells were treated with free ROBs at the indicated concentrations (vol/vol) for 24 h (black column), 48 h (grey column), and 72 h (white column). Micrographs shown are representative of the average cell morphology upon treatment with free-ROBs. No substantial differences were observed between the groups of control and treated cells. Scale bar 100  $\mu\text{m}$ .

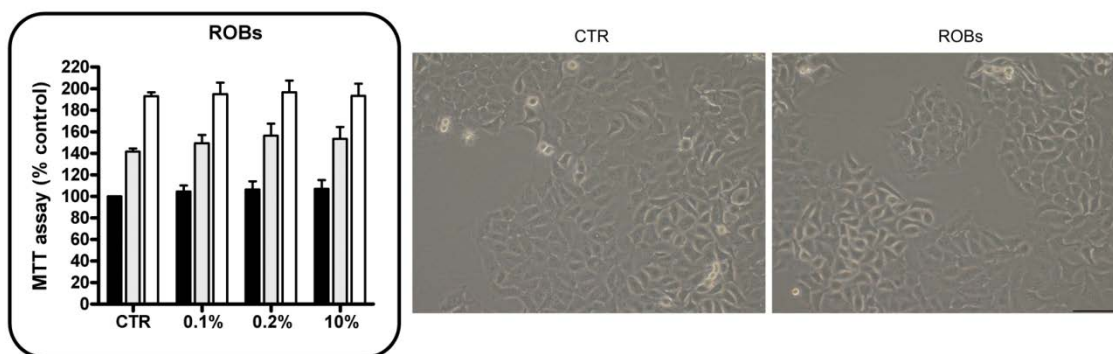

Supplement: c3ra40552d.pdf [file c3ra40552d.pdf]
